# Supplementary material for: Imine Reductase Based All-Enzyme Hydrogel with Intrinsic Cofactor Regeneration for Flow Biocatalysis
Source: MDPI journal article supplement (doi:10.3390/mi10110783), 2019-11-15
Supplement: s1 [file s1]

Supplementary Materials

# Imine Reductase Based All-Enzyme Hydrogel with Intrinsic Cofactor Regeneration for Flow Biocatalysis

Patrick Bitterwolf, Felix Ott, Kersten S. Rabe and Christof M. Niemeyer \*

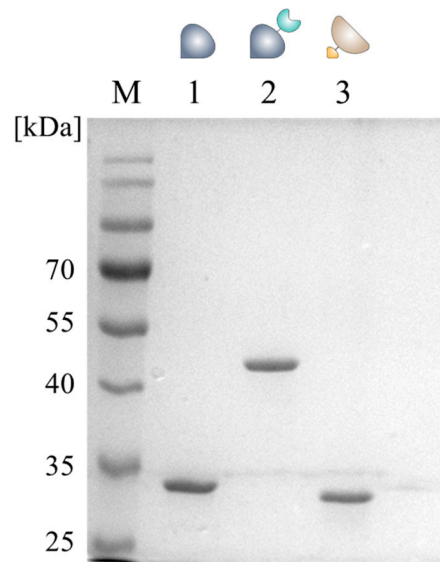

**Figure S1.** SDS-gel electrophoretic analysis of the purified recombinant proteins, used in this study. This is a coomassie stained 12% SDS-PAGE. M: Color Prestained Protein Standard, Broad Range (New England Biolabs); lane 1: GDH-His (29 kDa); lane 2: GDH-SC-His (41 kDa); lane 3: GF3546-ST (33 kDa).

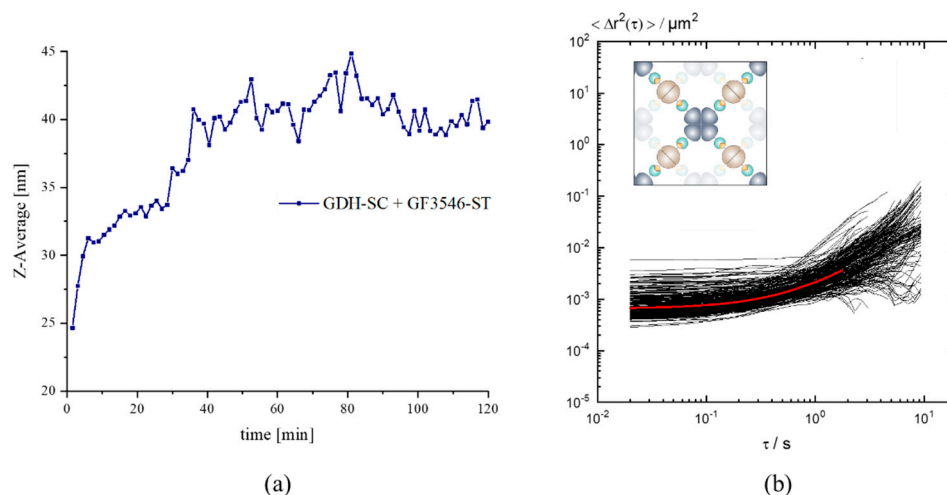

**Figure S2.** (a) Time-dependent increase of the hydrodynamic particle diameter of a 1 mM equimolar mixture of GDH-SC/GF3546-ST determined by DLS. (b) Optical microrheology measurements based on multiple particle tracking (MTP) analyses of gelled GDH-SC/GF3546-ST. Mean square displacements (MSDs) of individual polystyrene microspheres of 200 nm diameter determined for the gelled GDH-SC/GF3546-ST material were recorded (black curves). The red curve shows the ensemble-average MSD. Note that the MSDs exhibit almost no time dependence indicating that tracer particles are highly constrained by the surrounding hydrogel.

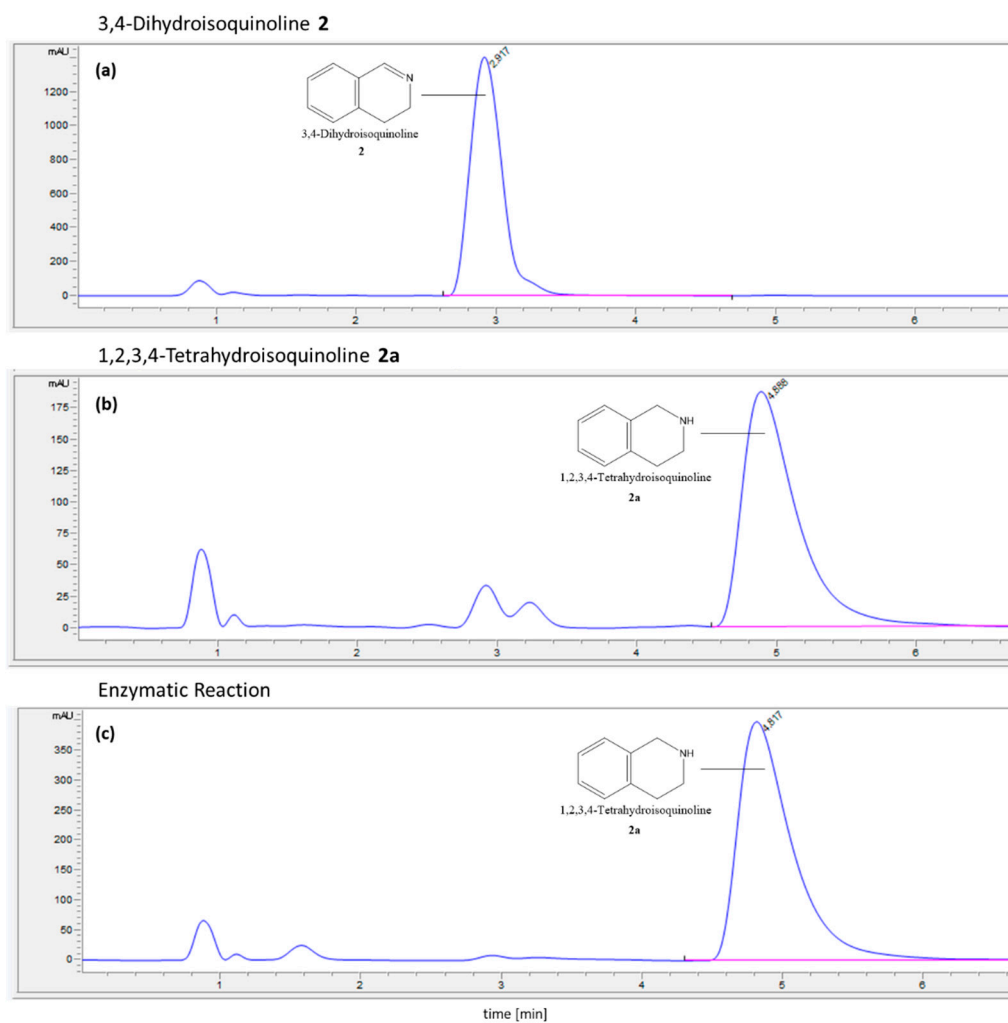

**Figure S3.** Representative HPLC traces of (a) the educt 3,4-Dihydroisoquinoline **2** and the corresponding amine product obtained from (b) chemical or (c) enzymatic reduction by GF3546-ST.

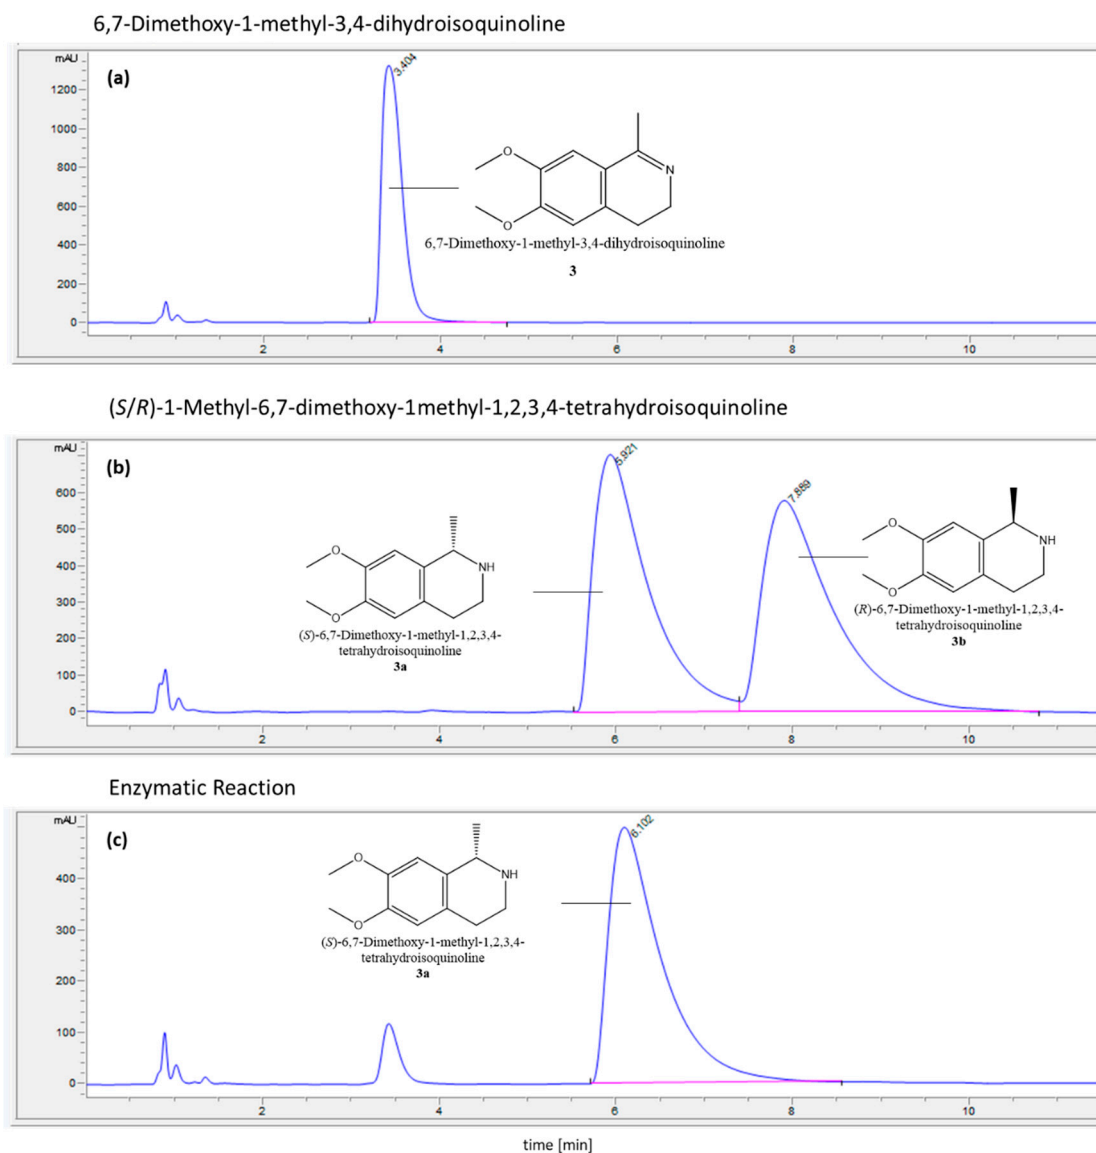

**Figure S4.** Representative HPLC traces of (a) the educt 6,7-Dimethoxy-1-methyl-3,4-dihydroisoquinoline **3** and the corresponding amine product obtained from (b) chemical or (c) enzymatic reduction by GF3546-ST.

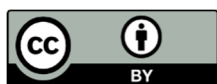

© 2019 by the authors. Submitted for possible open access publication under the terms and conditions of the Creative Commons Attribution (CC BY) license (<http://creativecommons.org/licenses/by/4.0/>).
